# Supplementary material
Source: MDPI journal article supplement (https://www.mdpi.com/2073-4344/11/8/914)
Supplement: s1 [file s1]

# **Recyclable Ir nanoparticles for the catalytic hydrogenation of biomass derived carbonyl compounds**

By

Roberto Sole, Chiara Buranello, Noemi Bardella, Alessandro Di Michele, Stefano Paganelli and  
Valentina Beghetto \*

## **Table of contents**

|                                                        |       |
|--------------------------------------------------------|-------|
| Ligands Synthesis.....                                 | 2-9   |
| $^1\text{H} - ^{13}\text{C}$ NMR of <b>L1-L6</b> ..... | 10-15 |
| Catalysis data.....                                    | 16    |
| TEM/SEM images.....                                    | 16-18 |

## Scheme S1: Synthesis of Ligands L1-L6

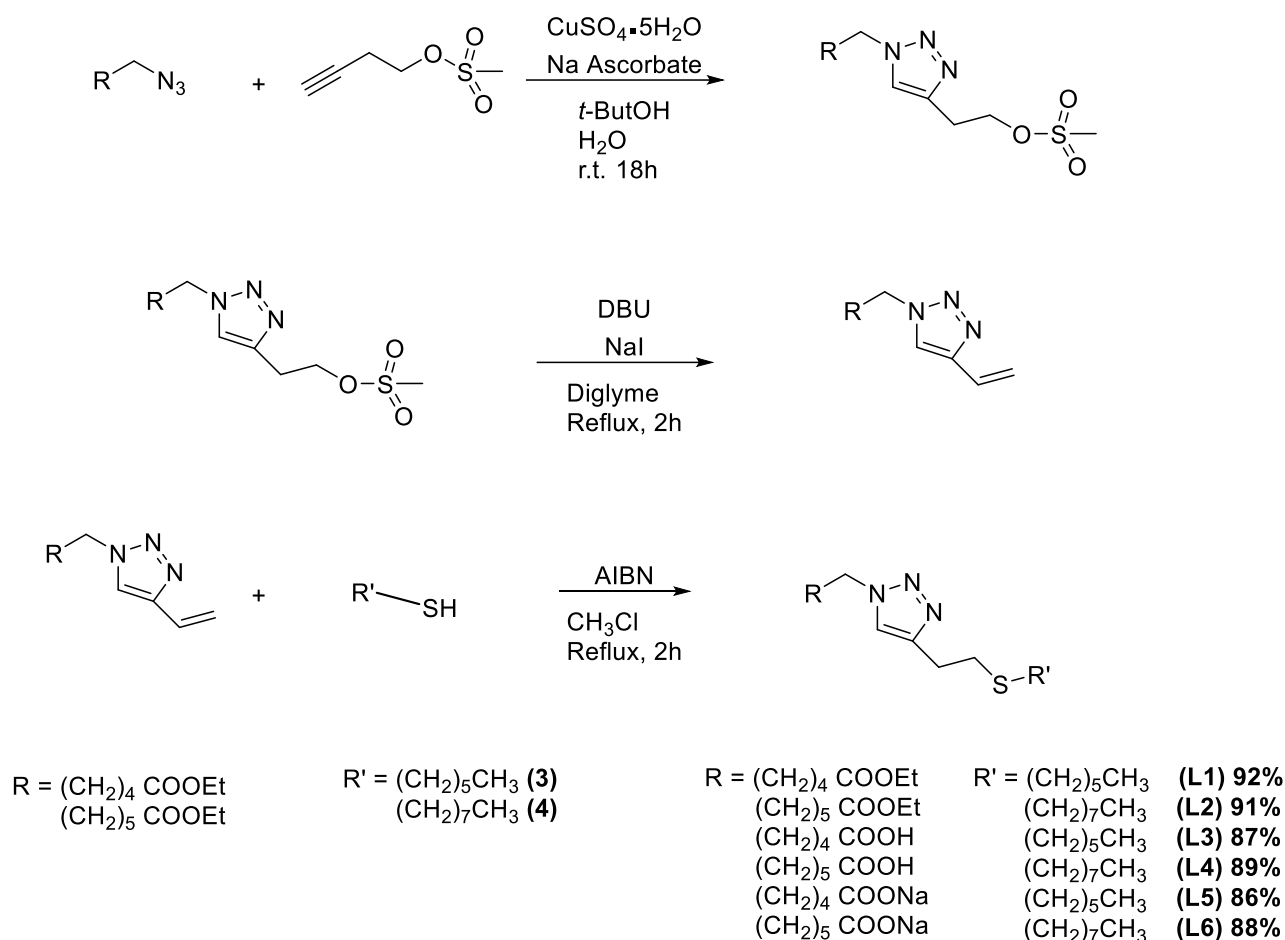

## Synthesis of Ethyl-5-azidopentanoate

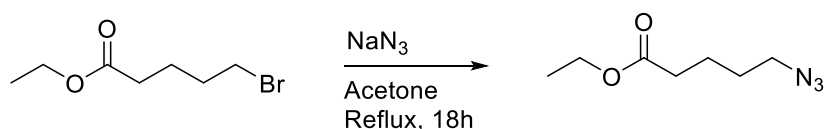

In a mixture of acetone (50 mL) and H<sub>2</sub>O (30 mL) ethyl 5-bromopentanoate (3.71 mL, 23.38 mmol) and sodium azide (4.56 g, 70.14 mmol) were dissolved. The colourless solution was stirred for 18 hours under reflux. Afterwards, no changing in the colour of the solution was observed. Acetone was removed under reduced pressure and aqueous residues were extracted with CH<sub>2</sub>Cl<sub>2</sub> (15 mL x 3). Organic layers were dried over MgSO<sub>4</sub>, filtered, and concentrated under vacuo to yield the desired product as a colourless oil (92% yield).

EA calcd for C<sub>7</sub>H<sub>13</sub>N<sub>3</sub>O<sub>2</sub>: C (49.11) H(7.65) N(24.54); found: C(49.78) H(7.71) N(24.6).

<sup>1</sup>H NMR (300 MHz, CDCl<sub>3</sub>) δ (ppm) = 4.12 (q, *J*=7.1 Hz, 2H), 3.28 (t, *J*=6.5 Hz, 2H), 2.32 (t, *J*=7.1 Hz, 2H), 1.83 – 1.50 (m, 4H), 1.24 (td, *J* = 7.2, 0.7 Hz, 3H).

$^{13}\text{C}$  NMR (300 MHz,  $\text{CDCl}_3$ )  $\delta$  (ppm) = 173.2, 60.4, 51.2, 33.8, 28.4, 22.2, 14.3.

HRMS (ESI) calcd for  $\text{C}_7\text{H}_{13}\text{N}_2\text{O}_3$   $[\text{M}+\text{H}]^+$ : 173.09264 found: 173.09301

### Synthesis of Ethyl-6-azidohexanoate

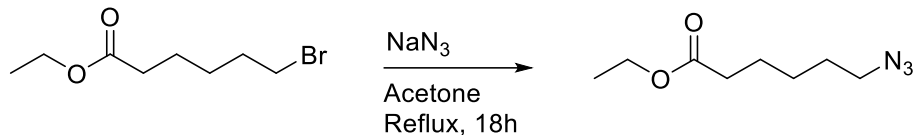

See the procedure abovementioned. Colourless oil (95% yield).

EA calcd for  $\text{C}_8\text{H}_{15}\text{N}_3\text{O}_2$ : C (51.88) H(8.16) N(22.69); found: C(51.75) H(7.91) N(23.20).

$^1\text{H}$  NMR (300 MHz,  $\text{CDCl}_3$ )  $\delta$  (ppm) = 4.01 (q,  $J=7.1$  Hz, 2H), 2.38 (t,  $J=6.5$  Hz, 2H), 1.66 (t,  $J=7.1$  Hz, 2H), 1.47 (m, 4H), 1.12 (td,  $J=7.2, 0.7$  Hz, 3H).

$^{13}\text{C}$  NMR (300 MHz,  $\text{CDCl}_3$ )  $\delta$  (ppm) = 173.5, 60.2, 50.3, 33.8, 29.4, 24.3, 22.2, 14.3.

HRMS (ESI) calcd for  $\text{C}_8\text{H}_{15}\text{N}_3\text{O}_2$   $[\text{M}+\text{H}]^+$ : 185.11644 found: 185.0751

### Synthesis of But-3-ynyl methanesulfonate

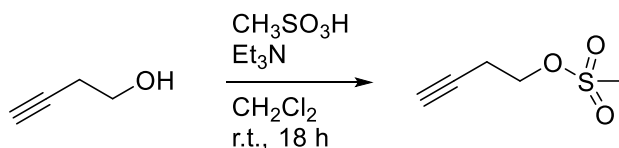

3-butyne-1-ol (1.62 mL, 21.40 mmol) and triethylamine (8.94 mL, 64.30 mmol) were dissolved in 100 mL of  $\text{CH}_2\text{Cl}_2$  and vigorously stirred. Afterwards, an ice bath was placed under the round bottom flask and methanesulfonic acid chloride (2.16 mL, 27.76 mmol) was dropwise added to the stirring solution over 20 minutes. At the end of the addition, the ice bath was removed and the orange solution was allowed to stir overnight at room temperature. After 18 hours, a solution of HCl 1M was added at the solution and the organic layer was extracted and washed three times with  $\text{CH}_2\text{Cl}_2$  (15 mL x 3), dried over  $\text{MgSO}_4$ , filtered. Volatiles were removed under reduced pressure and **2** was obtained as an orange oil (98% yield).

EA calcd for  $\text{C}_5\text{H}_8\text{O}_3\text{S}$ : C (40.53) H(5.44) S(21.64); found: C(40.66) H(5.34) S(22.01).

$^1\text{H}$  NMR (300 MHz,  $\text{CDCl}_3$ )  $\delta$  (ppm) = 4.29 (t,  $J=6.7$  Hz, 2H), 3.04 (s, 3H), 2.64 (td,  $J=6.7, 2.7$  Hz, 2H), 2.07 (t,  $J=2.7$  Hz, 1H).

$^{13}\text{C}$  NMR (300 MHz,  $\text{CDCl}_3$ )  $\delta$  (ppm) = 78.7, 71.0, 67.2, 37.6, 19.7.

HRMS (ESI) calcd for  $\text{C}_5\text{H}_8\text{O}_3\text{N}_3\text{S}$   $[\text{M}+\text{H}]^+$ : 148.01943 found: 148.01923

### Synthesis of ethyl 4-(4-(2-((methylsulfonyl)oxy)ethyl)-1*H*-1,2,3-triazol-1-yl)butanoate

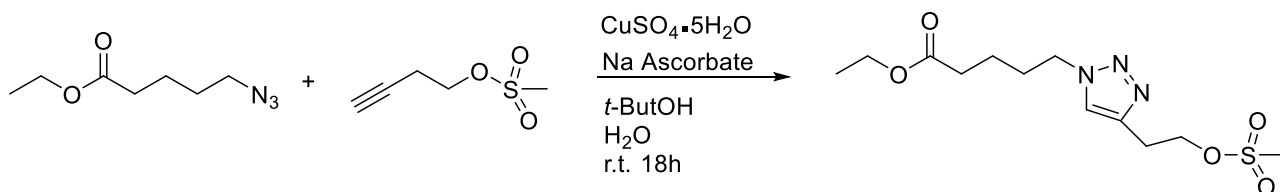

Ethyl-5-azidopentanoate (3.21 g, 18.77 mmol) and But-3-ynyl methanesulfonate (2.78 g, 18.77 mmol) were dissolved in *t*-ButOH (25 mL) and  $\text{H}_2\text{O}$  (20 mL). In a separate vial  $\text{CuSO}_4 \cdot 5\text{H}_2\text{O}$  (0.23 g, 0.94 mmol) and Na Ascorbate (0.37 g, 1.87 mmol) were dissolved in 5 mL of  $\text{H}_2\text{O}$  and vigorously mixed through a Pasteur pipette until a light brown emulsion was obtained. The mixture was then transferred dropwise to the reaction flask which after addition turned into a brown solution. The reaction was then allowed to stir at room temperature for 24 hours. A yellow solution was obtained and *t*-ButOH was eliminated under reduced pressure. The aqueous residues were then diluted with 10 mL of a saturated solution of EDTA and extracted with  $\text{CH}_2\text{Cl}_2$  (15 mL x 3) in order to remove copper salts traces. The organic layers were collected and dried over  $\text{MgSO}_4$ , filtered and volatiles eliminated under vacuo to yield ethyl 4-(4-(2-((methylsulfonyl)oxy)ethyl)-1*H*-1,2,3-triazol-1-yl)butanoate as a yellow oil (88% yield).

EA calcd for  $\text{C}_{12}\text{H}_{21}\text{N}_3\text{O}_5\text{S}$ : C (45.13) H(6.63) N(13.16) S(10.04); found: C(44.98) H(6.55) N(13.55) S(10.32)

$^1\text{H}$  NMR (300 MHz,  $\text{CDCl}_3$ )  $\delta$  (ppm) = 7.46 (s, 1H), 4.48 (t,  $J$  = 6.4 Hz, 2H), 4.32 (t,  $J$  = 7.1 Hz, 2H), 4.08 (q,  $J$  = 7.1 Hz, 2H), 3.14 (t,  $J$  = 7.2 Hz, 2H), 2.95 (s, 3H), 2.31 (t,  $J$  = 7.3 Hz, 2H), 2.04 – 1.81 (m, 2H), 1.72 – 1.49 (m, 2H), 1.21 (t,  $J$  = 7.1 Hz, 4H).

$^{13}\text{C}$  NMR (300 MHz,  $\text{CDCl}_3$ )  $\delta$  (ppm) = 172.8, 122.1, 68.7, 60.4, 49.9, 37.3, 33.3, 29.5, 26.0, 21.7, 14.2. HRMS (ESI) calcd for  $\text{C}_{12}\text{H}_{21}\text{O}_5\text{N}_3\text{S}$   $[\text{M}+\text{H}]^+$ : 319.12022 found: 319.12088

### Synthesis of ethyl 6-(4-(2-((methylsulfonyl)oxy)ethyl)-1*H*-1,2,3-triazol-1-yl)hexanoate

See the procedure abovementioned. Pale yellow oil (92%).

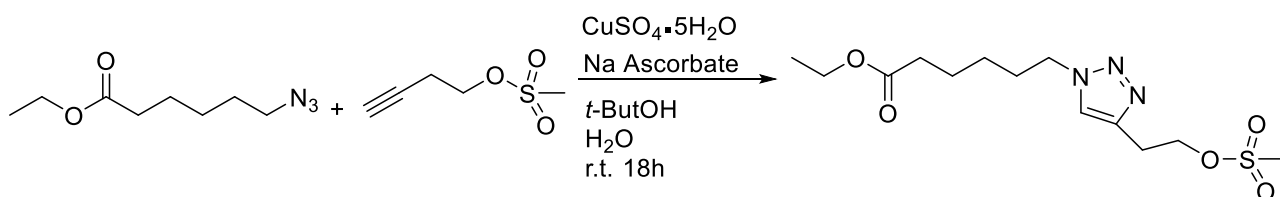

EA calcd for  $C_{13}H_{23}N_3O_5S$ : C (46.83) H(6.95) N(12.60) S(9.62); found: C(47.23) H(7.55) N(13.05) S(10.27)

$^1H$  NMR (300 MHz,  $CDCl_3$ )  $\delta$  (ppm) = 7.54 (s, 1H), 4.46 (t,  $J$  = 6.4 Hz, 2H), 4.12 (t,  $J$  = 7.1 Hz, 2H), 4.01 (q,  $J$  = 7.1 Hz, 2H), 3.10 (t,  $J$  = 7.2 Hz, 2H), 2.99 (s, 3H), 2.35 (t,  $J$  = 7.3 Hz, 2H), 2.14 – 1.87 (m, 2H), 1.69 (m, 2H), 1.37 (m, 2H), 1.11 (t,  $J$  = 7.1 Hz, 4H).

$^{13}C$  NMR (300 MHz,  $CDCl_3$ )  $\delta$  (ppm) = 172.8, 122.1, 68.7, 60.4, 49.9, 42.5, 37.3, 33.3, 29.5, 26.0, 21.7, 14.2.

HRMS (ESI) calcd for  $C_{13}H_{23}O_5N_3S$   $[M+H]^+$ : 333.1359 found:333.1253.

### Synthesis of ethyl 5-(4-vinyl-1*H*-1,2,3-triazol-1-yl)pentanoate

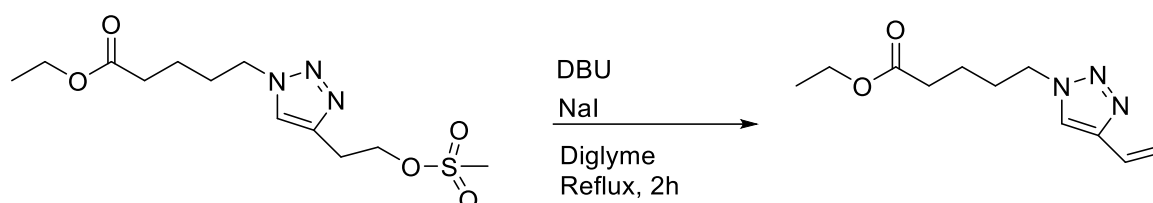

Ethyl 4-(4-(2-((methylsulfonyl)oxy)ethyl)-1*H*-1,2,3-triazol-1-yl)butanoate (5.27 g, 16.50 mmol) and NaI (7.42 g, 49.50 mmol) were dissolved in glyme (80 mL) and stirred at room temperature for 1 hour until an intense orange solution was obtained. DBU (4.93 mL, 33.00 mmol) was then added and the solution was refluxed for 3 hours while the solution turned into a white emulsion. Afterwards, solids formed during reaction were filtered and washed with EtOAc. Organic layers were dried over  $MgSO_4$ , filtered and concentrated to yield ethyl 5-(4-vinyl-1*H*-1,2,3-triazol-1-yl)pentanoate as a yellow oil (85% yield).

EA calcd for  $C_{11}H_{17}O_2N_3$ : C (59.17) H(7.67) N(18.82); found: C(59.21) H(7.83) N(18.12)

$^1H$  NMR (300 MHz,  $CDCl_3$ )  $\delta$  (ppm) = 7.53 (s, 1H), 6.73 (dd,  $J$ =17.8, 11.2 Hz, 1H), 5.89 (dd,  $J$ =17.7, 1.3 Hz, 1H), 5.35 (dd,  $J$ =11.2, 1.3 Hz, 1H), 4.37 (t,  $J$  = 7.1 Hz, 2H), 4.13 (d,  $J$  = 7.2 Hz, 2H), 2.36 (t,  $J$  = 7.2 Hz, 2H), 2.13 – 1.85 (m, 2H), 1.80 – 1.59 (m, 2H), 1.26 (t, 6.1 Hz, 3H).

$^{13}C$  NMR (300 MHz,  $CDCl_3$ )  $\delta$  (ppm) = 172.9, 146.4, 125.7, 120.0, 115.9, 60.5, 49.8, 33.4, 29.6, 21.8, 14.2.

HRMS (ESI) calcd for  $C_{11}H_{17}O_2N_3$   $[M+H]^+$ : 223.13209 found: 223.13232.

### Synthesis of ethyl 6-(4-vinyl-1*H*-1,2,3-triazol-1-yl)hexanoate

See the procedure abovementioned. Pale yellow oil (87%)

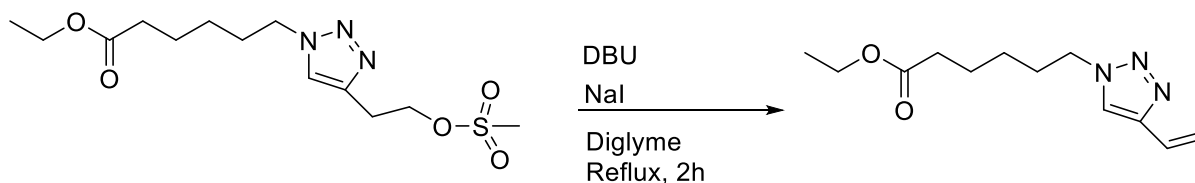

EA calcd for  $C_{12}H_{19}O_2N_3$ : C (60.74) H(8.07) N(17.71); found: C(59.62) H(7.13) N(16.92)

$^1H$  NMR (300 MHz,  $CDCl_3$ )  $\delta$  (ppm) = 7.58 (s, 1H), 6.62 (dd,  $J=17.8, 11.2$  Hz, 1H), 5.85 (dd,  $J=17.7, 1.3$  Hz, 1H), 5.45 (dd,  $J=11.2, 1.3$  Hz, 1H), 4.32 (t,  $J=7.1$  Hz, 2H), 4.17 (d,  $J=7.2$  Hz, 2H), 2.36 (t,  $J=7.2$  Hz, 2H), 2.01 (m, 2H), 1.67 (m, 2H), 1.26 (m,  $J=8.2, 6.1$  Hz, 2H), 1.15 (t,  $J=6.2$  Hz, 3H)

$^{13}C$  NMR (300 MHz,  $CDCl_3$ )  $\delta$  (ppm) = 172.8, 146.7, 125.2, 119.7, 116.2, 60.1, 49.2, 41.4, 33.4, 29.5, 21.6, 14.0,

HRMS (ESI) calcd for  $C_{12}H_{19}O_2N_3$   $[M+H]^+$ : 237.1477 found: 237.1459.

### Synthesis of ethyl 5-(4-(2-(hexylthio)ethyl)-1H-1,2,3-triazol-1-yl)pentanoate (L1)

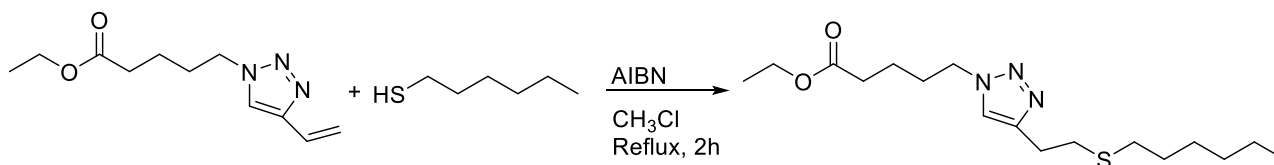

Ethyl 5-(4-vinyl-1H-1,2,3-triazol-1-yl)pentanoate (1.82 g, 8.14 mmol), 1-hexanthiol (1.38 mL, 9.76 mmol) and AIBN (0.67 g, 4.07 mmol) were dissolved in chloroform (25 mL) and refluxed. The reaction was monitored by  $^1H$  NMR. After 2 hours, complete conversion. The crude mixture was then purified by flash chromatography (Hexan/EtOAc 7:3) to yield **L1** as a pale yellow oil (92% yield).

EA calcd for  $C_{17}H_{31}O_2N_3S$ : C (59.79) H(9.15) N(12.30) S(9.39); found: C(59.21) H(9.54) N(12.66) S(9.57)

$^1H$  NMR (300 MHz,  $CDCl_3$ )  $\delta$  (ppm) = 7.40 (s, 1H), 4.36 (t,  $J=7.1$  Hz, 2H), 4.15 (q,  $J=7.1$  Hz, 2H), 3.02 (t,  $J=7.4$  Hz, 2H), 2.86 (t,  $J=7.4$  Hz, 2H), 2.55 (t,  $J=7.4$  Hz, 2H), 2.36 (t,  $J=7.2$  Hz, 2H), 1.96 (m, 2H), 1.77 – 1.50 (m, 4H), 1.48 – 1.05 (m, 11H), 0.91 (t,  $J=6.6$  Hz, 3H).

$^{13}C$  NMR (300 MHz,  $CDCl_3$ )  $\delta$  (ppm) = 172.9, 146.4, 121.1, 60.5, 49.8, 33.4, 32.2, 31.7, 31.4, 29.6, 28.6, 26.3, 22.5, 22.5, 21.8, 14.2, 14.0.

HRMS (ESI) calcd for  $C_{17}H_{31}O_2N_3S$   $[M+H]^+$ : 341.21371 found: 341.21354

### Synthesis ethyl 6-(4-(2-(octylthio)ethyl)-1H-1,2,3-triazol-1-yl)hexanoate (L2)

See the procedure abovementioned. Pale yellow oil (91%)

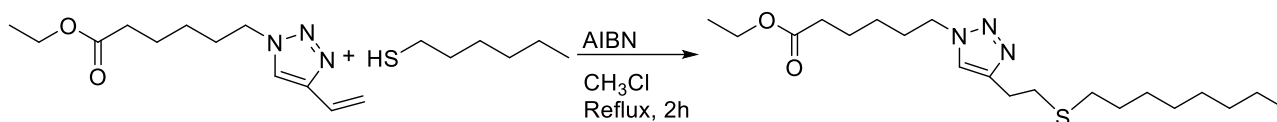

EA calcd for  $C_{19}H_{35}O_2N_3S$ : C (61.75) H(9.55) N(11.37) S(8.67); found: C(60.82) H(9.04) N(12.46) S(9.01)

$^1H$  NMR (300 MHz,  $CDCl_3$ )  $\delta$  (ppm) = 7.37 (s, 1H), 4.44 (t,  $J$  = 7.1 Hz, 2H), 4.13 (q,  $J$  = 7.1 Hz, 2H), 3.00 (t,  $J$  = 7.4 Hz, 2H), 2.83 (t,  $J$  = 7.4 Hz, 2H), 2.52 (t,  $J$  = 7.4 Hz, 2H), 2.34 (t,  $J$  = 7.2 Hz, 2H), 1.95 (m, 2H), 1.65 (m, 4H), 1.25 (m, 13H), 0.88 (t,  $J$  = 6.6 Hz, 3H).

$^{13}C$  NMR (300 MHz,  $CDCl_3$ )  $\delta$  (ppm) = 172.8, 145.9, 120.3, 60.3, 50.8, 41.9, 32.4, 31.2, 30.9, 30.4, 29.4, 28.3, 26.7, 23.3, 22.9, 21.7, 14.6, 14.3.

HRMS (ESI) calcd for  $C_{19}H_{35}O_2N_3S$   $[M+H]^+$ : 369.2451 found: 369.2342

### Synthesis of 5-(4-(2-(hexylthio)ethyl)-1H-1,2,3-triazol-1-yl)pentanoic acid (**L3**)

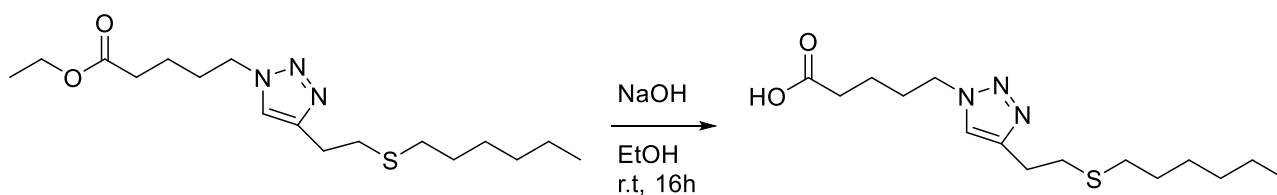

**L1** (0.90 g, 2.67 mmol) was dissolved in EtOH (6 mL) and a solution of NaOH (0.20 g, 5 mmol) and  $H_2O$  (4 mL) was added and the reaction was allowed to gently stir for 16 hours at room temperature. At the end of this period, EtOH was removed under vacuo and aqueous layer was diluted with HCl 1 M (25 mL) and extracted with  $CH_2Cl_2$  (15 mL x 3). Organic solutions were dried over  $MgSO_4$ , filtered, and concentrated to yield **L3** as a white solid (87% yield).

EA calcd for  $C_{15}H_{26}O_2N_3S$ : C (57.66) H(8.39) N(13.45) S(10.26); found: C(57.11) H(8.54) N(13.54) S(10.56)

$^1H$  NMR (300 MHz,  $CDCl_3$ )  $\delta$  (ppm) 10.51 (bs, 1H), 7.43 (s, 1H), 4.34 (t,  $J$  = 7.0 Hz, 2H), 2.99 (t,  $J$  = 7.2 Hz, 2H), 2.81 (s, 2H), 2.50 (t,  $J$  = 7.4 Hz, 2H), 2.38 (t,  $J$  = 7.2 Hz, 2H), 2.05 – 1.87 (m, 2H), 1.60 (m, 4H), 1.43 – 1.18 (m, 9H), 0.85 (t,  $J$  = 6.7 Hz, 3H).

$^{13}C$  NMR (300 MHz,  $CDCl_3$ )  $\delta$  (ppm) = 178.4, 130.7, 121.9, 52.1, 33.4, 32.2, 31.7, 31.4, 29.6, 28.6, 26.3, 22.5, 22.5, 21.8, 14.2.

HRMS (ESI) calcd for  $C_{15}H_{26}O_2N_3S$   $[M+H]^+$ : 312.17458 found: 312.17323

### Synthesis of 6-(4-(2-(octylthio)ethyl)-1H-1,2,3-triazol-1-yl)hexanoic acid (**L4**)

See the procedure abovementioned. White solid (89%).

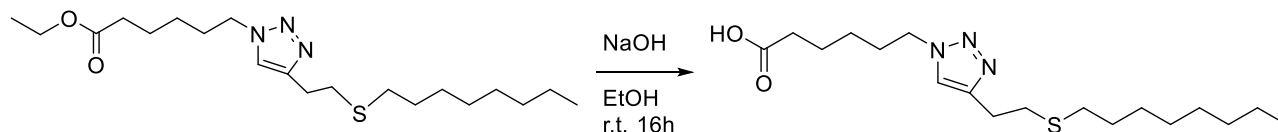

EA calcd for for  $C_{18}H_{33}O_2N_3S$ : C (60.81) H(9.36) N(11.82) S(9.02); found: C(60.17) H(9.01) N(12.14) S(9.86)

$^1H$  NMR (300 MHz,  $CDCl_3$ )  $\delta$  (ppm) 10.01 (bs, 1H), 7.37 (s, 1H), 4.44 (t,  $J = 7.0$  Hz, 2H), 3.00 (t,  $J = 7.2$  Hz, 2H), 2.83 (s, 2H), 2.52 (t,  $J = 7.4$  Hz, 2H), 2.34 (t,  $J = 7.2$  Hz, 2H), 1.95 (m, 2H), 1.65 (m, 4H), 1.25 (m, 13H), 0.88 (t,  $J = 6.7$  Hz, 3H).

$^{13}C$  NMR (300 MHz,  $CDCl_3$ )  $\delta$  (ppm) = 173.4, 146.9, 121.5, 60.9, 50.4, 33.9, 32.7, 32.1, 30.1, 29.6, 29.3, 26.8, 26.3, 23.1, 22.3, 14.7.8, 14.5.

HRMS (ESI) calcd for  $C_{18}H_{33}O_2N_3S$   $[M+H]^+$ : 355.2293 found: 355.2343

#### Synthesis of sodium 5-(4-(2-(hexylthio)ethyl)-1H-1,2,3-triazol-1-yl)pentanoate (L5)

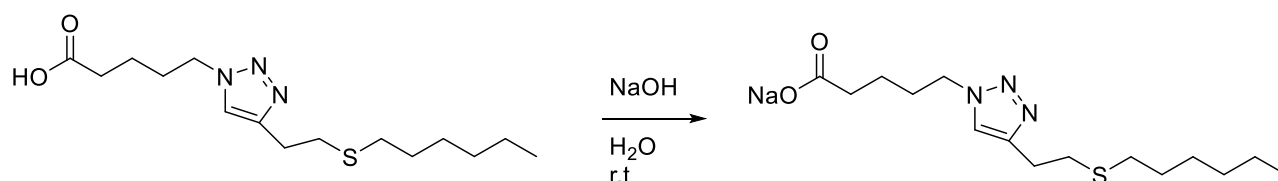

An aqueous solution of NaOH 1M (10 mL) was added to a round bottom flask containing L4 (L4/NaOH=1:1) The heterogenous mixture was allowed to vigorously stir for 2 hours until an homogenous colourless solution was obtained. Evaporating water under vacuo allowed to obtained L5 as a white solid (86%).

EA calcd for for  $C_{15}H_{25}O_2N_3SNa$ : C (53.87) H(7.53) N(12.56) S(9.59); found: C(54.11) H(7.34) N(13.12) S(9.78)

(300 MHz,  $CDCl_3$ )  $\delta$  (ppm) 10.51 (bs, 1H), 7.43 (s, 1H), 4.34 (t,  $J = 7.0$  Hz, 2H), 2.99 (t,  $J = 7.2$  Hz, 2H), 2.81 (s, 2H), 2.50 (t,  $J = 7.4$  Hz, 2H), 2.38 (t,  $J = 7.2$  Hz, 2H), 2.05 – 1.87 (m, 2H), 1.60 (m, 4H), 1.43 – 1.18 (m, 9H), 0.85 (t,  $J = 6.7$  Hz, 3H).

$^{13}C$  NMR (300 MHz,  $CDCl_3$ )  $\delta$  (ppm) = 178.4, 130.7, 121.9, 52.1, 33.4, 32.2, 31.7, 31.4, 29.6, 28.6, 26.3, 22.5, 22.5, 21.8, 14.2,

HRMS (ESI) calcd for  $C_{15}H_{26}O_2N_3SNa$   $[M+H]^+$ : 335.16435 found: 335.15261



### Synthesis of sodium 6-(4-(2-(octylthio)ethyl)-1*H*-1,2,3-triazol-1-yl)hexanoate (L6)

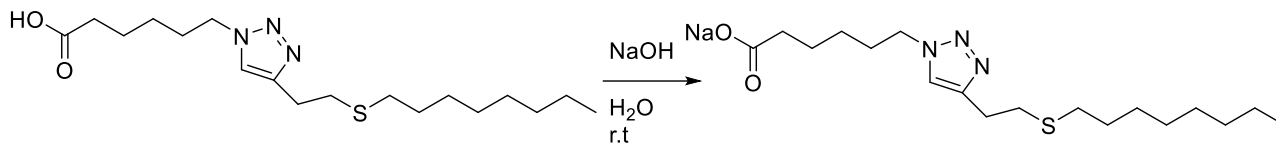

See the procedure abovementioned. White solid (88%)

EA calcd for C<sub>18</sub>H<sub>32</sub>O<sub>2</sub>N<sub>3</sub>SNa: C (60.81) H(9.36) N(11.82) S(9.02); found: C(60.17) H(9.01) N(12.14) S(9.86)

<sup>1</sup>H NMR (300 MHz, D<sub>2</sub>O)  $\delta$  (ppm) 7.33 (s, 1H), 4.26 (t,  $J$  = 7.0 Hz, 2H), 3.24 (t,  $J$  = 7.2 Hz, 2H), 2.87 (s, 2H), 2.51 (t,  $J$  = 7.4 Hz, 2H), 2.33 (t,  $J$  = 7.2 Hz, 2H), 1.97 (m, 2H), 1.61 (m, 4H), 1.24 (m, 13H), 0.4 (t,  $J$  = 6.7 Hz, 3H).

HRMS (ESI) calcd for C<sub>18</sub>H<sub>33</sub>O<sub>2</sub>N<sub>3</sub>SNa [M+H]<sup>+</sup>: 377.2113; found: 377.2578

*Ethyl 5-(4-(2-(hexylthio)ethyl)-1H-1,2,3-triazol-1-yl)pentanoate (L1)*

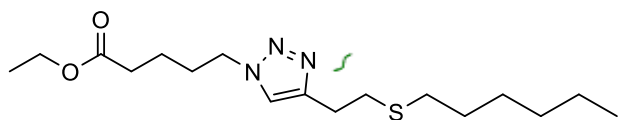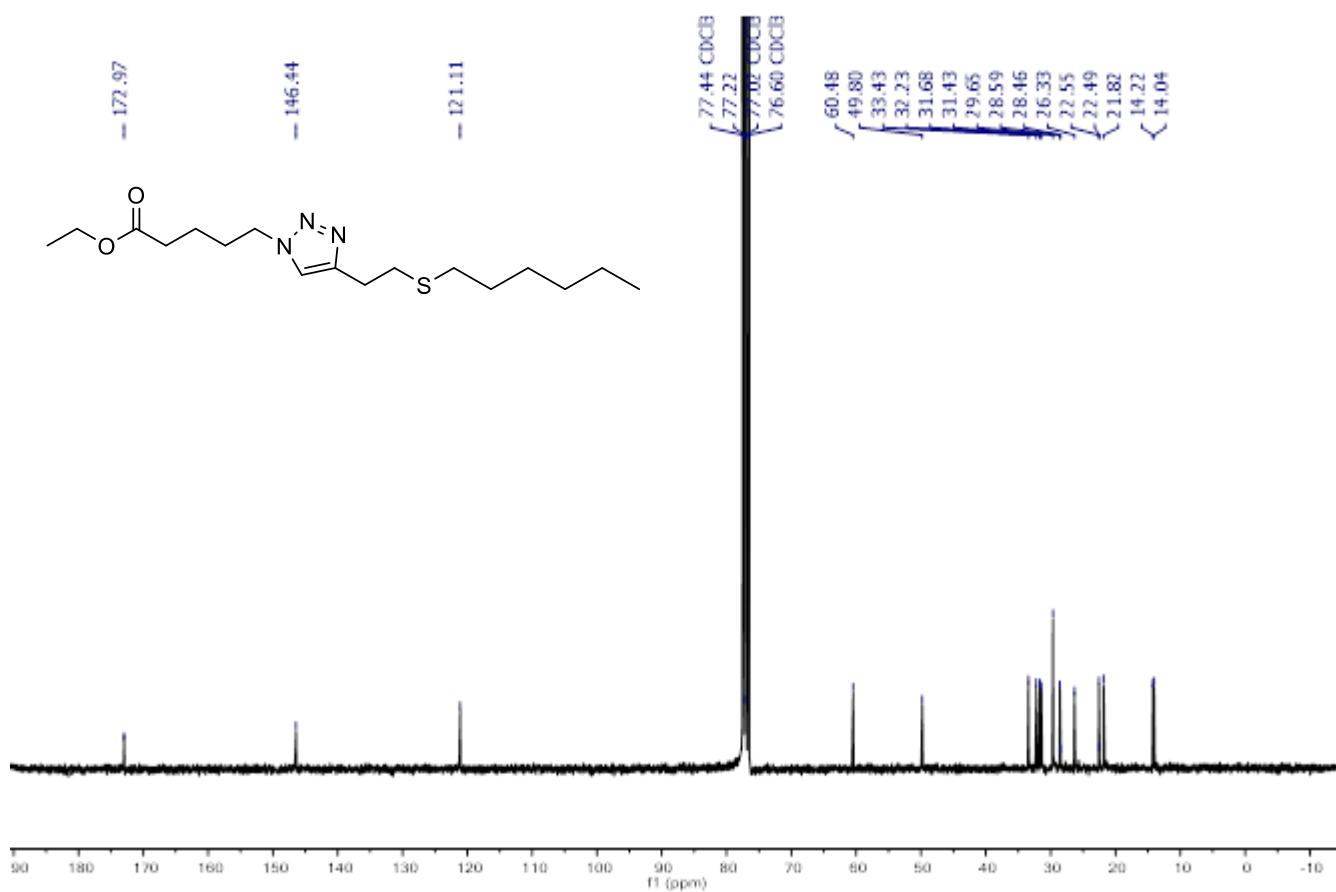

*Ethyl 6-(4-(2-(octylthio)ethyl)-1H-1,2,3-triazol-1-yl)hexanoate (L2)*

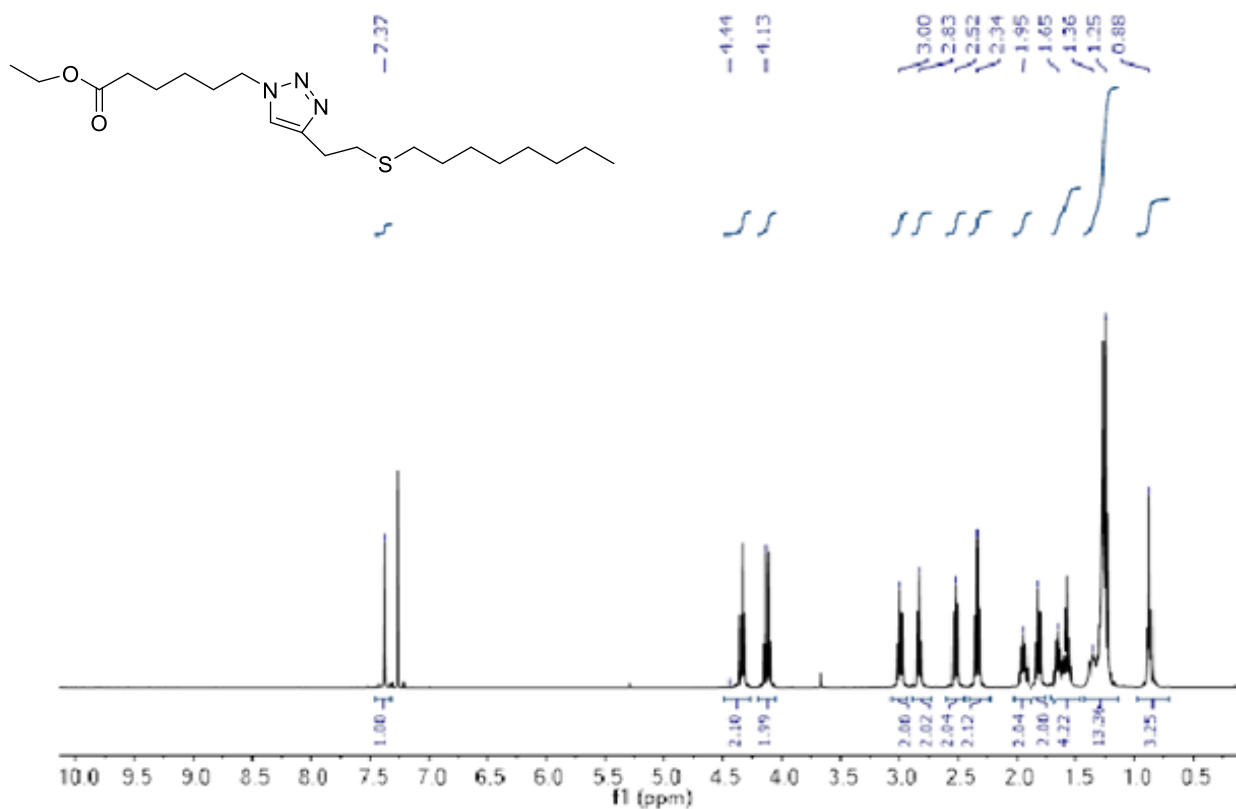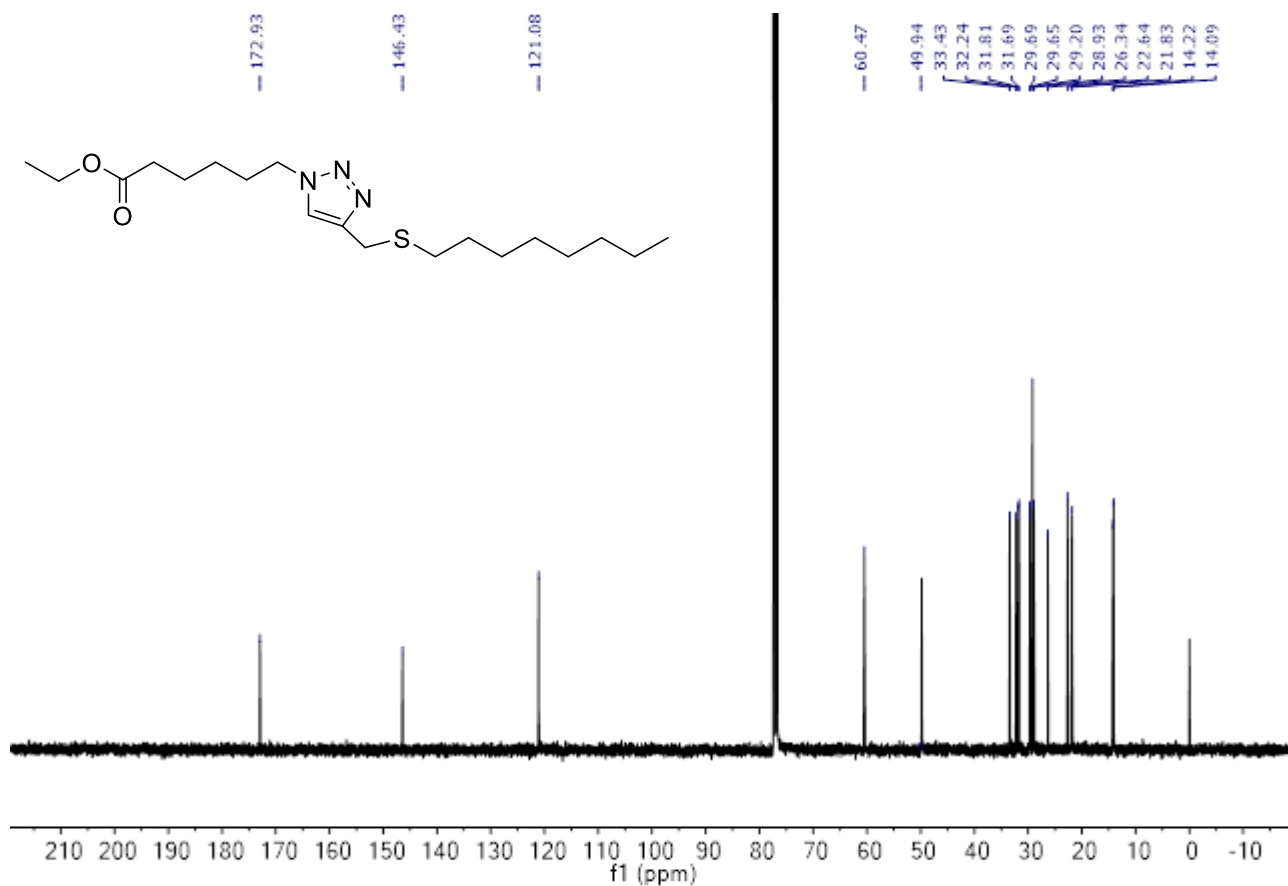

5-(4-(2-(hexylthio)ethyl)-1H-1,2,3-triazol-1-yl)pentanoic acid (**L3**)

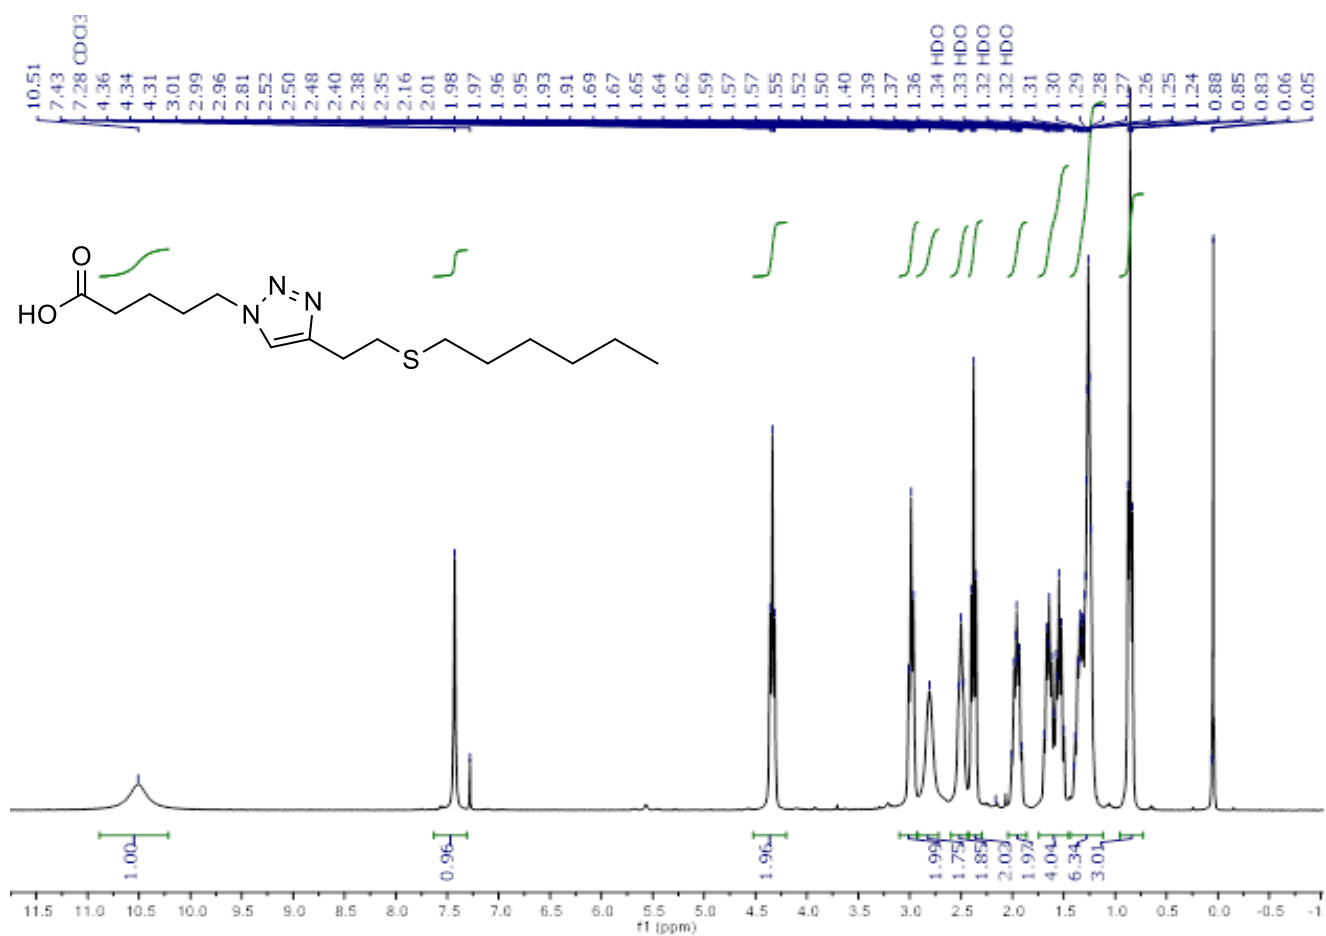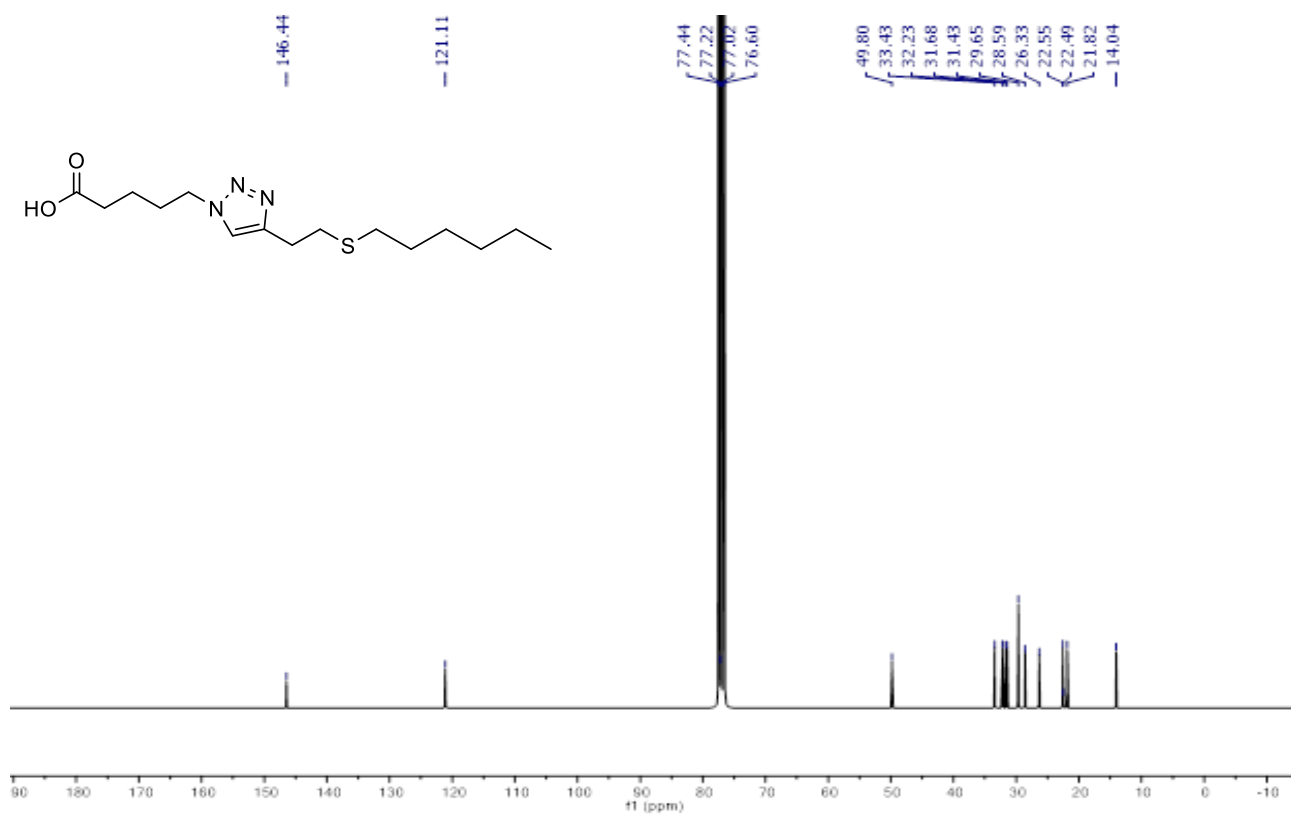

6-(4-(2-(octylthio)ethyl)-1H-1,2,3-triazol-1-yl)hexanoic acid (**L4**)

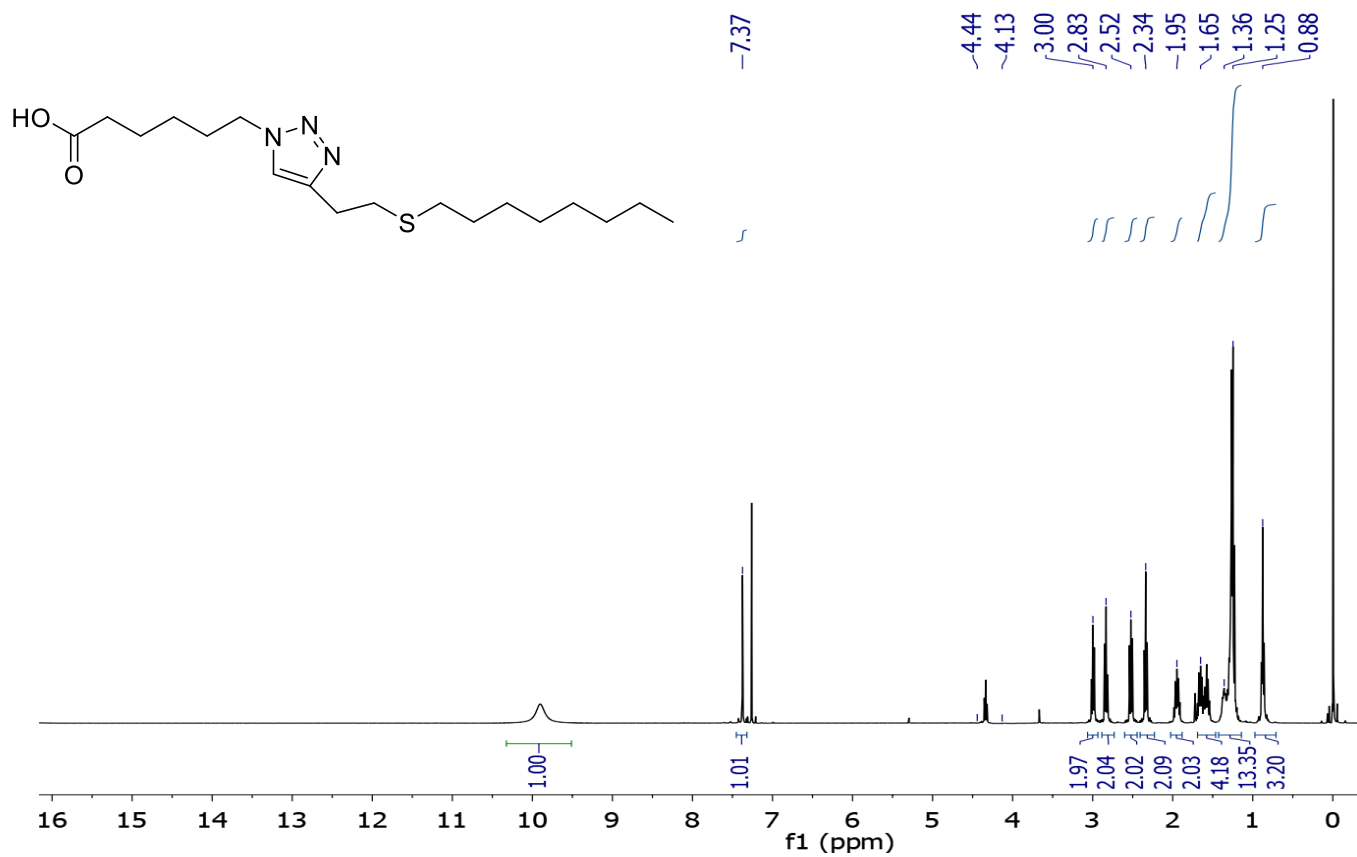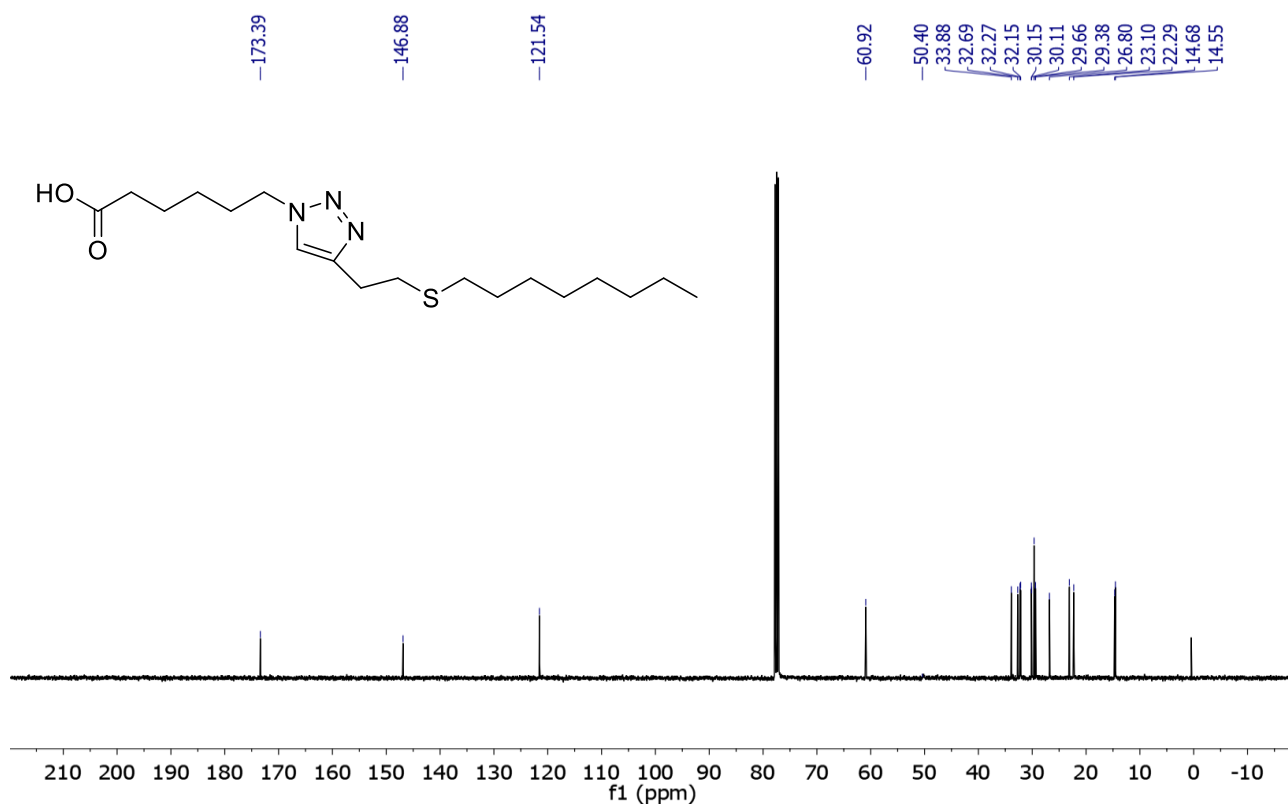

Sodium 5-(4-(2-(hexylthio)ethyl)-1H-1,2,3-triazol-1-yl)pentanoate (L5)

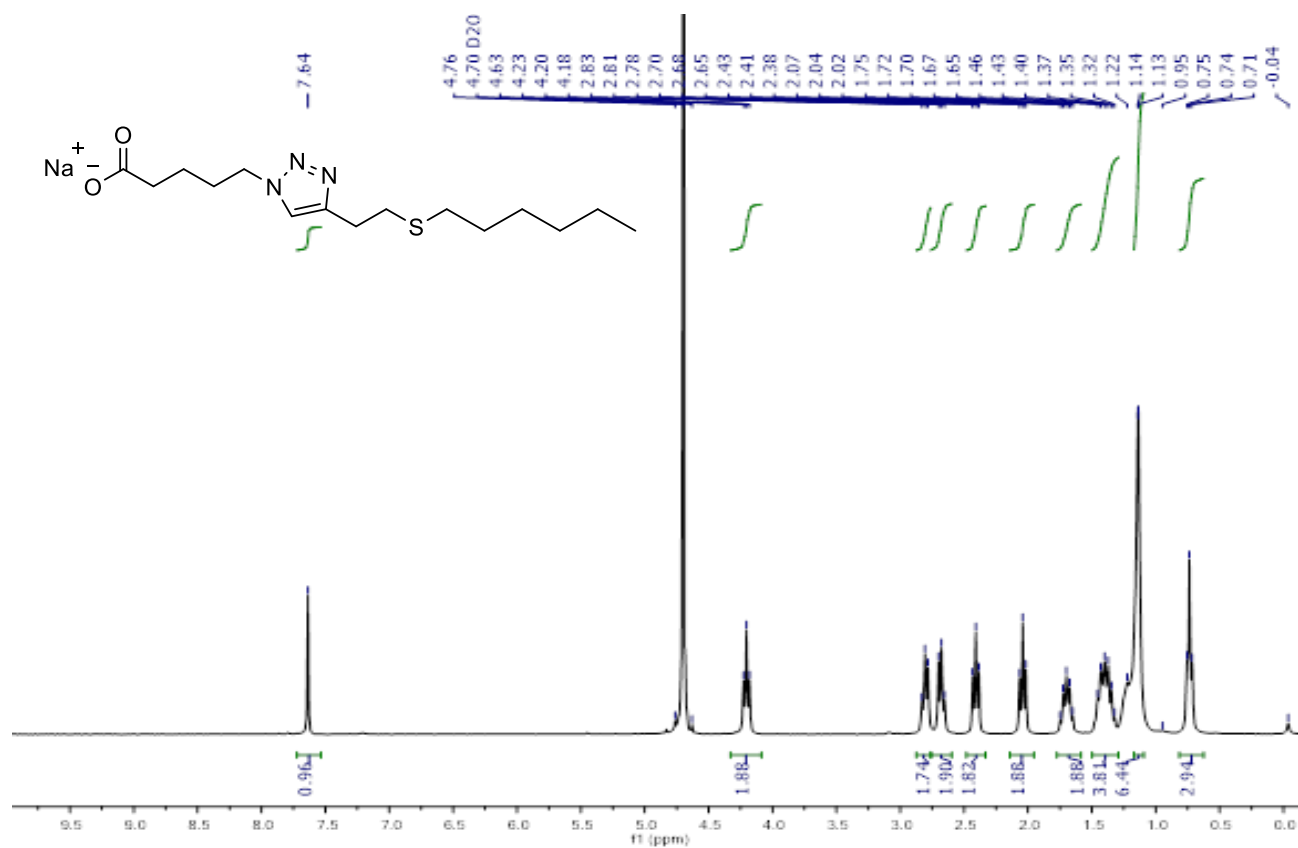

Sodium 6-(4-(2-(octylthio)ethyl)-1H-1,2,3-triazol-1-yl)hexanoate (L6)

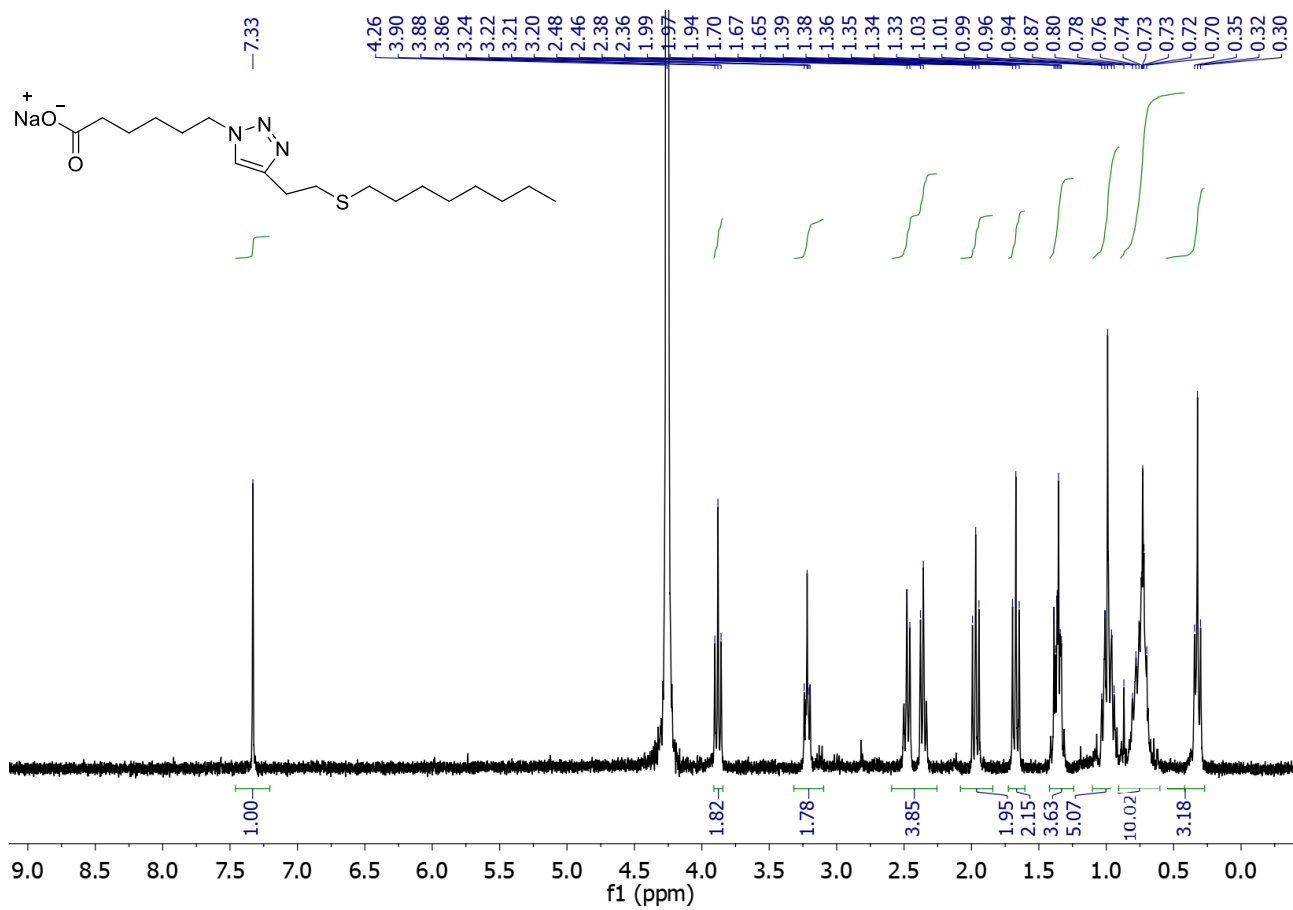

## Catalysis data

**Table S1.** Ligands and solvent screening for the hydrogenation of FUR to FA

| $  \begin{array}{c}  \text{OH} \\    \\  \text{C}_5\text{H}_4\text{O} + \text{H}_2 \xrightarrow[\text{H}_2\text{O/THF}]{[\text{Ir}(\text{COD})\text{Cl}]_2/\text{L1-L6}} \text{C}_5\text{H}_4\text{O} \\  \text{FUR} \qquad \qquad \qquad \text{FA}  \end{array}  $ |           |                                  |           |
|---------------------------------------------------------------------------------------------------------------------------------------------------------------------------------------------------------------------------------------------------------------------|-----------|----------------------------------|-----------|
| Entry <sup>a</sup>                                                                                                                                                                                                                                                  | Ligand    | Solvent                          | Yield (%) |
| 1                                                                                                                                                                                                                                                                   | <b>L1</b> | EtOH                             | n.d.      |
| 2                                                                                                                                                                                                                                                                   | <b>L1</b> | <i>i</i> -PrOH                   | 12        |
| 3                                                                                                                                                                                                                                                                   | <b>L1</b> | CH <sub>2</sub> Cl <sub>2</sub>  | 35        |
| 4                                                                                                                                                                                                                                                                   | <b>L1</b> | H <sub>2</sub> O/ <i>i</i> -PrOH | 21        |
| 5                                                                                                                                                                                                                                                                   | <b>L2</b> | CH <sub>2</sub> Cl <sub>2</sub>  | 19        |
| 6                                                                                                                                                                                                                                                                   | <b>L3</b> | EtOH                             | 18        |
| 7                                                                                                                                                                                                                                                                   | <b>L3</b> | CH <sub>2</sub> Cl <sub>2</sub>  | 33        |
| 8                                                                                                                                                                                                                                                                   | <b>L3</b> | H <sub>2</sub> O                 | 46        |
| 9                                                                                                                                                                                                                                                                   | <b>L4</b> | CH <sub>2</sub> Cl <sub>2</sub>  | 16        |
| 10                                                                                                                                                                                                                                                                  | <b>L4</b> | H <sub>2</sub> O                 | 27        |
| 11                                                                                                                                                                                                                                                                  | <b>L5</b> | H <sub>2</sub> O                 | 70        |
| 12                                                                                                                                                                                                                                                                  | <b>L6</b> | H <sub>2</sub> O                 | 59        |

<sup>a</sup> Reaction conditions: [Ir(COD)Cl]<sub>2</sub> = 0.1 mol%, Ligand **L1-L6** = 0.2 mol%, NaOH (10 eq.), Furfural = 5.3 mmol, P<sub>H2</sub>=40 bar, T = 60 °C, THF = 3.0 mL, H<sub>2</sub>O = 3.0 mL, Time = 18 hours <sup>b</sup> GC yields using dodecane as internal standard <sup>c</sup> Recycling experiment referred to the previous entry

## TEM and SEM images of different L:M ratios

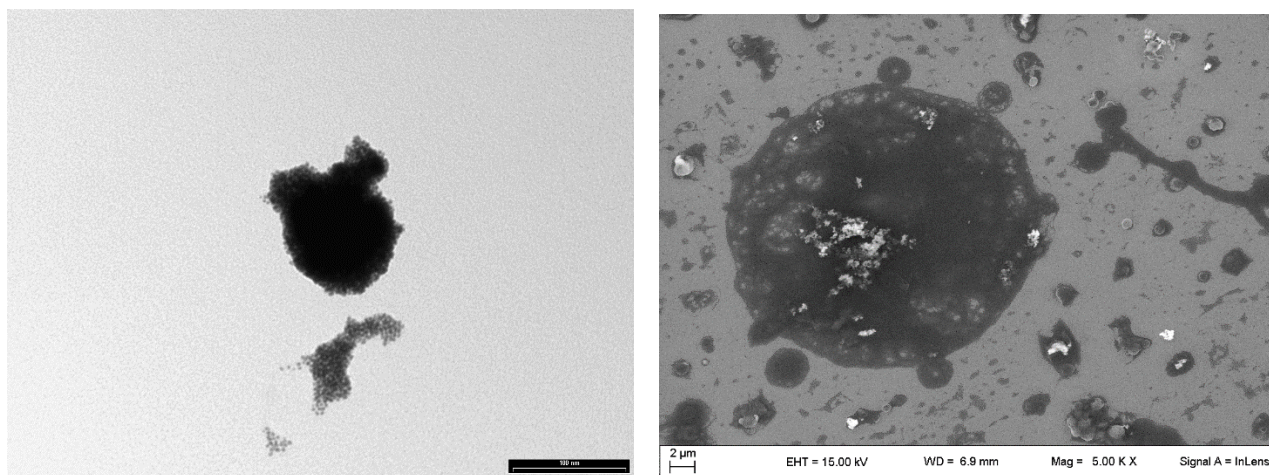

Figure S1: TEM (left) and SEM (right) of [Ir(COD)Cl]<sub>2</sub> with no surfactant ligand added.



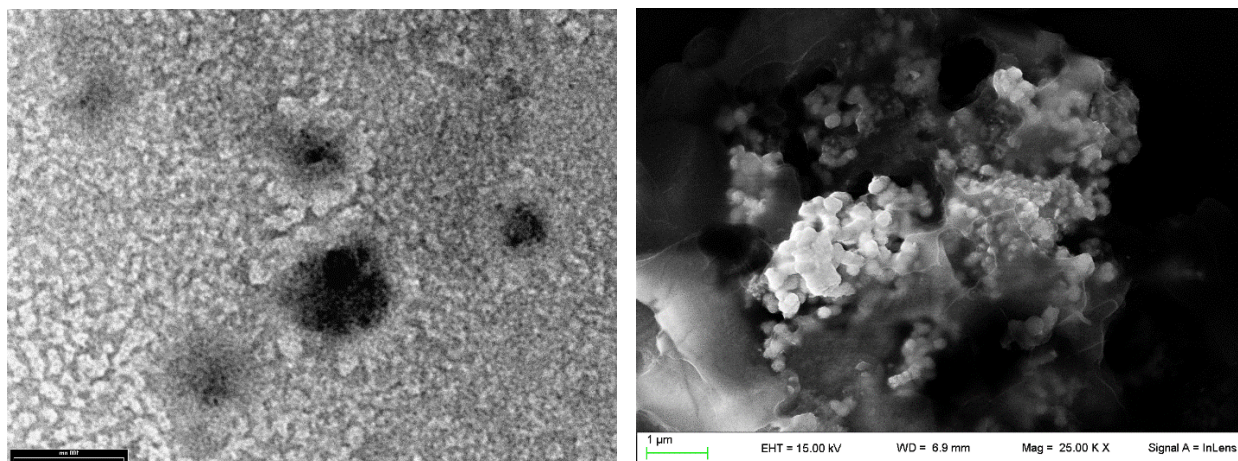

Figure S2: TEM (left) and SEM (right) of  $[\text{Ir}(\text{COD})\text{Cl}]_2 / \text{L5}$  1:0.25

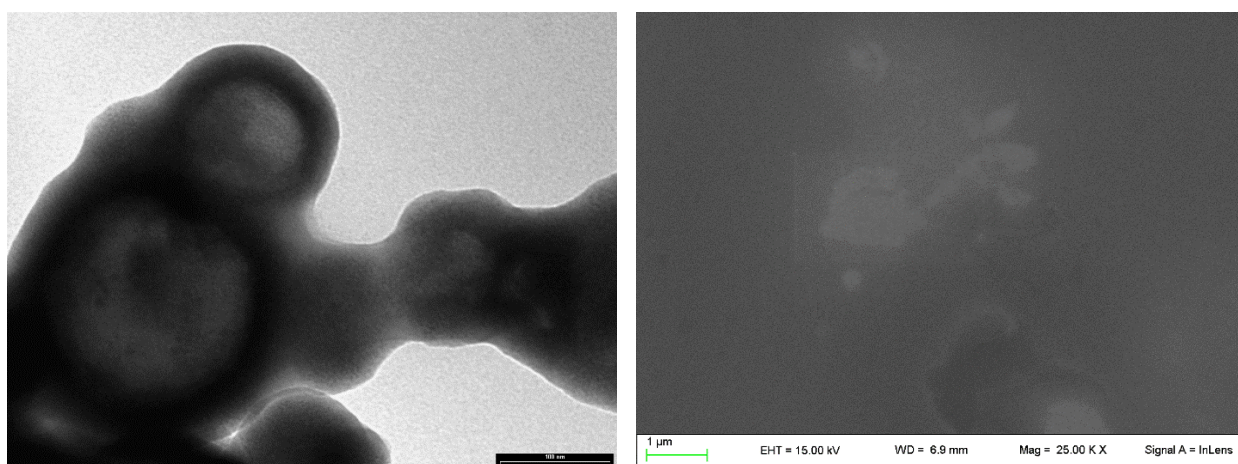

Figure S3: TEM (left) and SEM (right) of  $[\text{Ir}(\text{COD})\text{Cl}]_2 / \text{L5}$  1:0.75

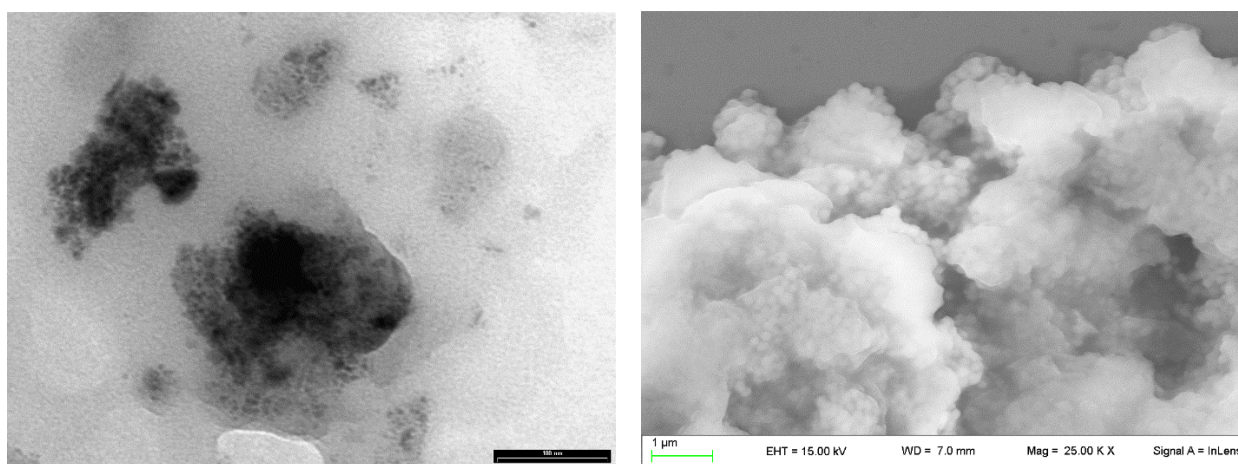

Figure S4: TEM (left) and SEM (right) of  $[\text{Ir}(\text{COD})\text{Cl}]_2 / \text{L5}$  1:1

**TEM and SEM images of different  $\text{Ir}(\text{COD})\text{Cl}_2/\text{L6}$  1:0.5**

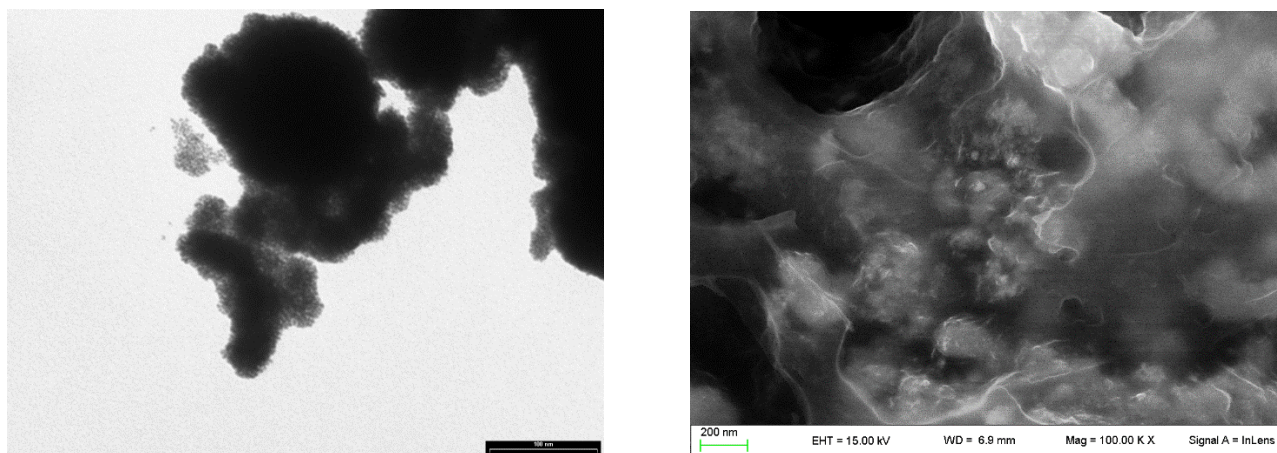

Figure S5: TEM (left) and SEM (right) of  $[\text{Ir}(\text{COD})\text{Cl}]_2/\text{L6}$  1:0.5
